# Supplementary material
Source: PubMed Central journal article supplement (PMC6991890)
Supplement: NIHMS1548921-supplement-Supplemental_Figures.pdf [file NIHMS1548921-supplement-Supplemental_Figures.pdf]

## SUPPLEMENTAL MATERIAL

Replacing saturated fat with unsaturated fat in western diet reduces foamy monocytes and atherosclerosis in male *Ldlr*<sup>-/-</sup> mice

Zeqin Lian, Xiao-yuan Dai Perrard, Xueying Peng, Joe L. Raya, Alfredo A. Hernandez, Collin G. Johnson, William R. Lagor, Henry J. Pownall, Ron C. Hoogeveen, Scott I. Simon, Frank M. Sacks, Christie M. Ballantyne, Huaizhu Wu

From the Department of Medicine (Z.L., X.D.P., X.P., J.L.R., C.G.J., R.C.H., C.M.B., H.W.), Department of Molecular Physiology and Biophysics (W.R.L.), Department of Pediatrics (C.M.B., H.W.), and Center for Cardiometabolic Disease Prevention (C.M.B.), Baylor College of Medicine, Houston, TX; Houston Methodist Research Institute, Houston, TX (H.J.P.); Department of Biomedical Engineering, University of California, Davis (A.A.H, S.I.S.); Department of Nutrition, Harvard School of Public Health, and Department of Medicine, Harvard Medical School and Brigham and Women's Hospital, Boston, MA (F.M.S.); and Institute of Materia Medica, Peking Union Medical College Hospital, Chinese Academy of Medical Sciences and Peking Union Medical College, Beijing, China (X.P).

## Supplemental Tables

Table I. Diet composition

| Diet components (% by weight) | ND           | WD   | EVOND |
|-------------------------------|--------------|------|-------|
| Saturated fat                 | 1.4          | 13.3 | 2.6   |
| MUFA                          | 1.54         | 5.9  | 13.4  |
| PUFA                          | 2.36         | 0.9  | 4.3   |
| Cholesterol                   | undetectable | 0.2  | 0.2   |
| Carbohydrates                 | 58           | 49   | 49    |
| Protein                       | 25           | 19   | 19    |

Fat source in Western diet (WD) is milkfat (21% w/w) and in extra-virgin olive oil and nuts diet (EVOND) is extra-virgin olive oil (15% w/w), walnuts (3% w/w), almonds (1.5% w/w), and hazelnuts (1.5% w/w).

Table II. Major fatty acid composition in the diets

| Fatty acid (% of total measured) | Nomenclature | ND    | WD    | EVOND |
|----------------------------------|--------------|-------|-------|-------|
| <b>Saturated fat</b>             |              |       |       |       |
| Capric acid                      | C10:0        | 0.1   | 3.58  | 0.14  |
| Lauric acid                      | C12:0        | 0.25  | 2.47  | 0.11  |
| Myristic acid                    | C14:0        | 2.27  | 10.93 | 0.32  |
| Palmitic acid                    | C16:0        | 29.52 | 52.71 | 12.95 |
| Stearic acid                     | C18:0        | 5.06  | 9.58  | 1.65  |
| <b>Monounsaturated fat</b>       |              |       |       |       |
| Palmitoleic acid                 | C16:1        | 1.93  | 0.7   | 0.31  |
| Oleic acid                       | C18:1        | 22.39 | 18.56 | 72.52 |
| <b>Polyunsaturated fat</b>       |              |       |       |       |
| Linoleic acid                    | C18:2        | 34.63 | 0.61  | 11.75 |
| $\alpha$ -linolenic acid         | C18:3        | 0.9   | 0.34  | 0.12  |

|                             |       |      |      |       |
|-----------------------------|-------|------|------|-------|
| Arachidonic acid            | C20:4 | 1.01 | 0.25 | 0.09  |
| Eicosapentaenoic acid (EPA) | C20:5 | 1.82 | 0.02 | 0.01  |
| Docosahexaenoic acid (DHA)  | C22:6 | 0.14 | 0.24 | 0.002 |

Table III. Primer sequences used in qPCR

| Mouse genes | Primers | Sequences                   |
|-------------|---------|-----------------------------|
| GAPDH       | Forward | CGACTTCAACAGCAACTCCCCTCTTCC |
|             | Reverse | TGGGTGGTCCAGGGTTTCTTACTCCTT |
| Srebf1      | Forward | GATGTGCGAACTGGACACAG        |
|             | Reverse | CATAGGGGGCGTCAAACAG         |
| SCD1        | Forward | TTCTTGCGATACTCTGGTGC        |
|             | Reverse | CGGGATTGAATGTTCTTGTCGT      |
| FAS         | Forward | AAGTGTCTGGACTGTGTCATTTTTACA |
|             | Reverse | TTAATTGTGGGATCAGGAGAGCAT    |
| CD36        | Forward | TCCAGCCAATGCCTTTGC          |
|             | Reverse | TCAGTGCAGAAACAATGGTTGTC     |

# Supplemental Figure I

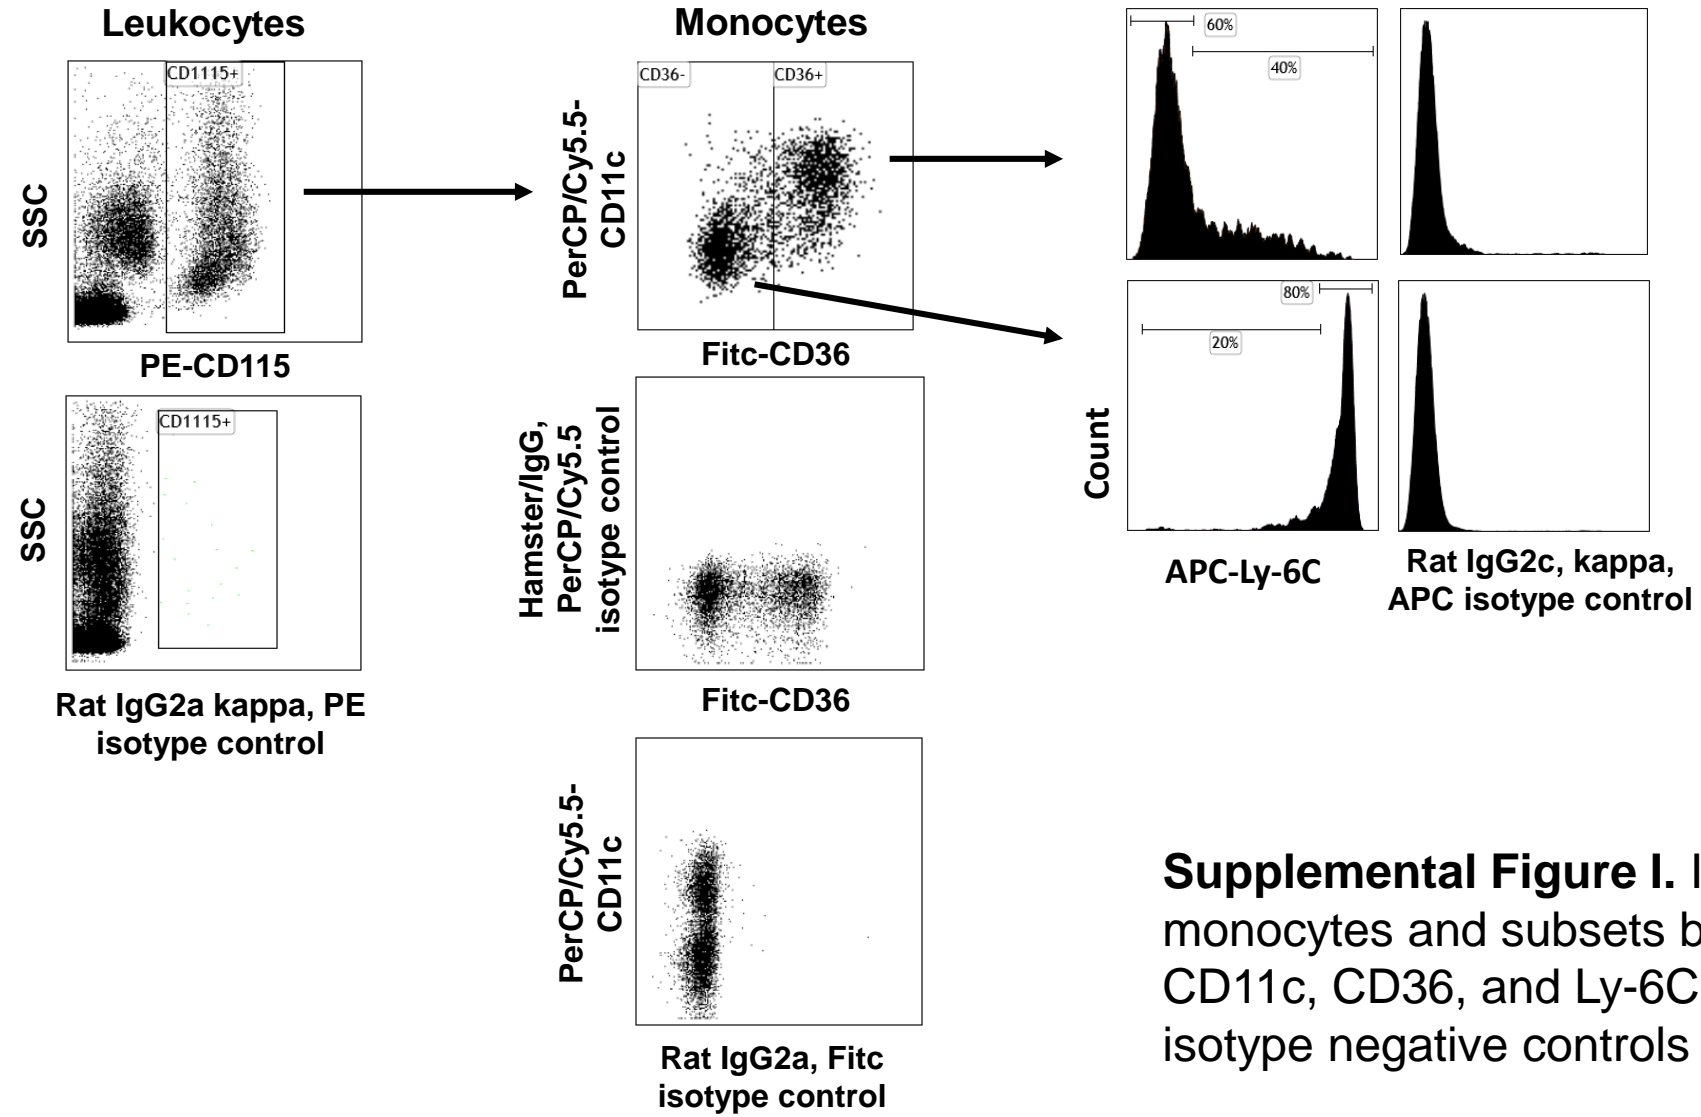

**Supplemental Figure I.** Identification of blood monocytes and subsets by staining for CD115, CD11c, CD36, and Ly-6C or with corresponding isotype negative controls in *Ldlr*<sup>-/-</sup> mice.

## Supplemental Figure II

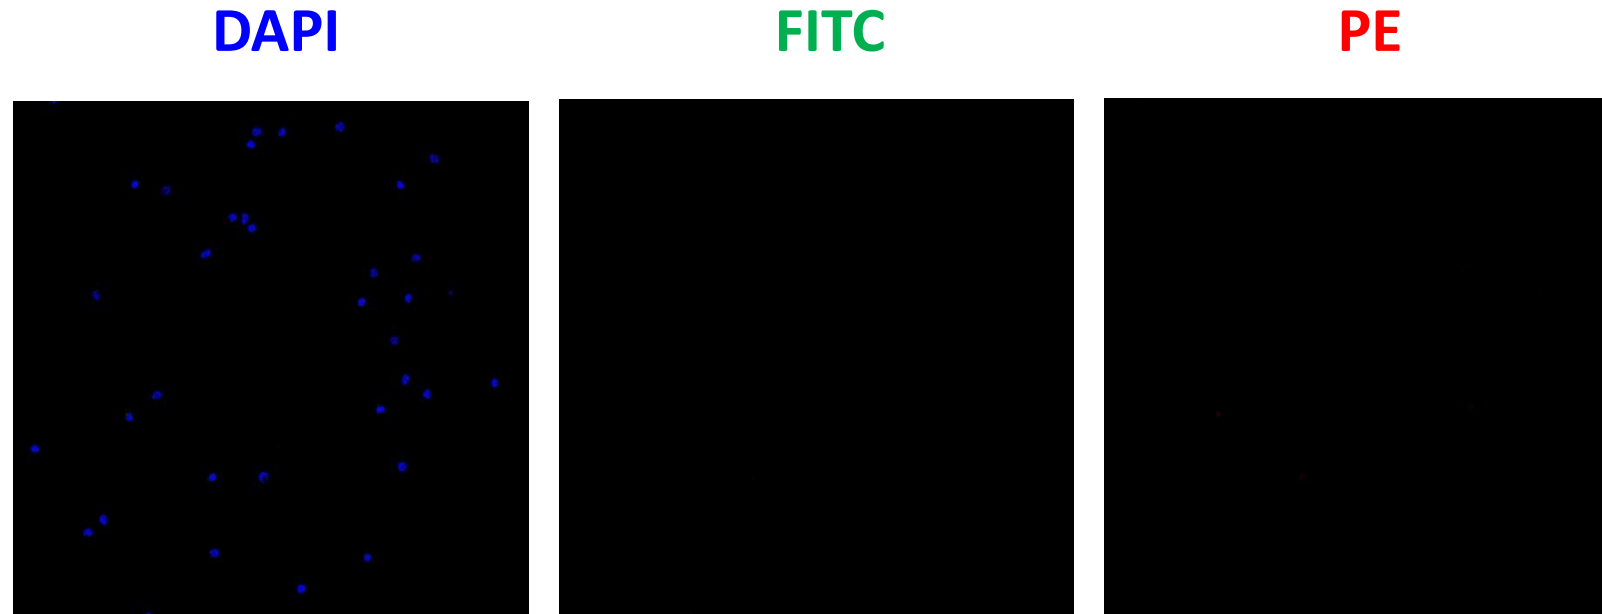

**Supplemental Figure II.** Fluorescent isotype control staining of on-chip adhesion assay of monocytes (20x original magnification). PE, rat IgG2a  $\kappa$  isotype control; FITC, Alexa Fluor® 488 Armenian hamster IgG isotype control. See Figure 5B for positive staining.

## Supplemental Figure III

DAPI

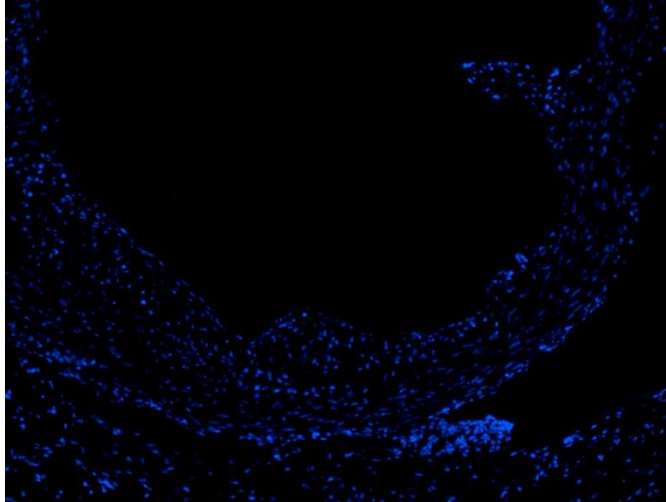

FITC

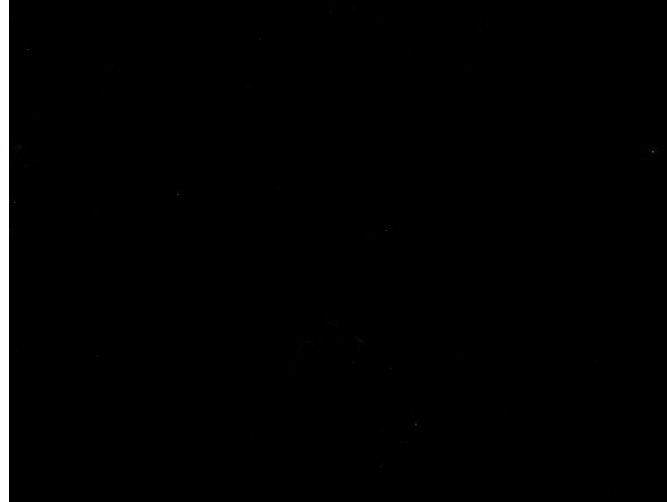

PE

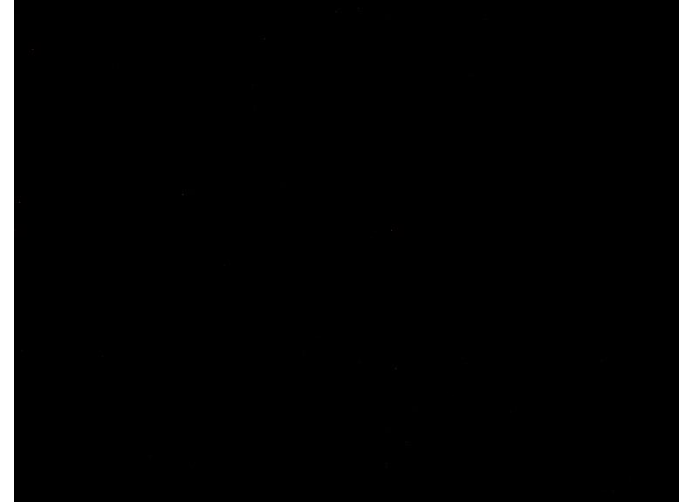

**Supplemental Figure III.** Fluorescent isotype control staining of aortic sinus lesions (10x original magnification). PE, hamster IgG1  $\kappa$  isotype control; FITC, rat IgG2b  $\kappa$  isotype Ccontrol. See Figure 6C for positive staining.

# Supplemental Figure IV

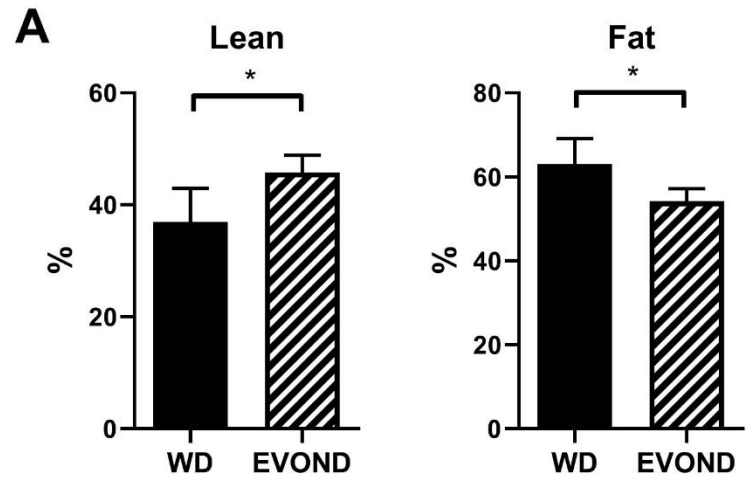

**Supplemental Figure IV.** Body composition, plasma glucose and insulin levels, and insulin tolerance test (ITT) in mice on WD or EVOND for 3 months. A, Percentages of lean mass and fat mass were measured using Lunar scanner. B, Plasma glucose and insulin levels. C, Insulin tolerance test. Data are shown as mean  $\pm$  SEM. n=8/group, \*p<0.05.

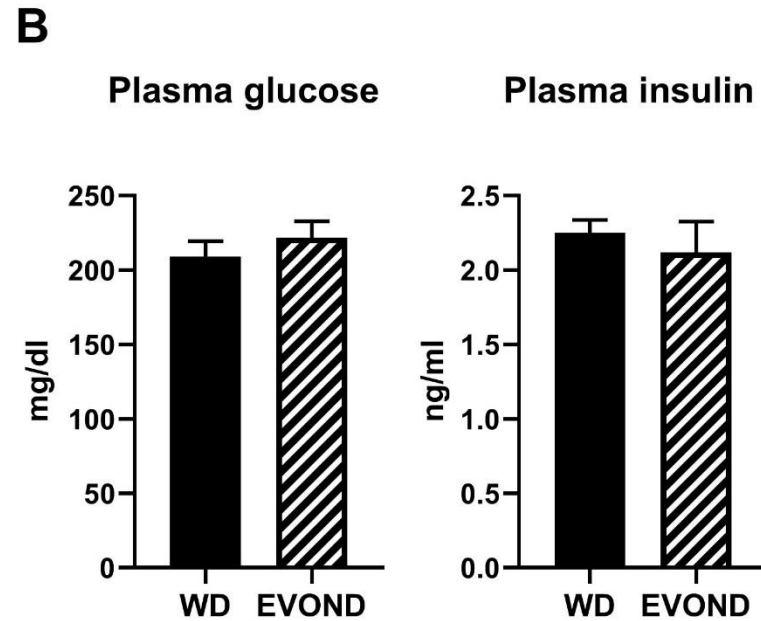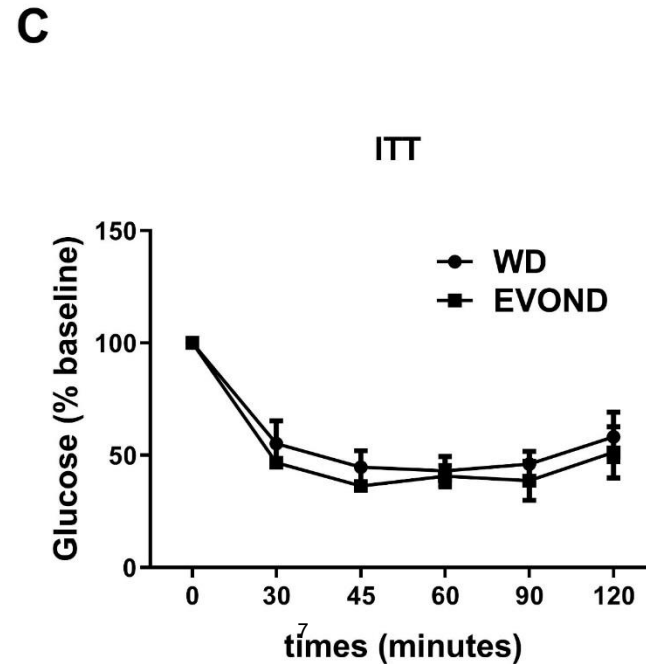

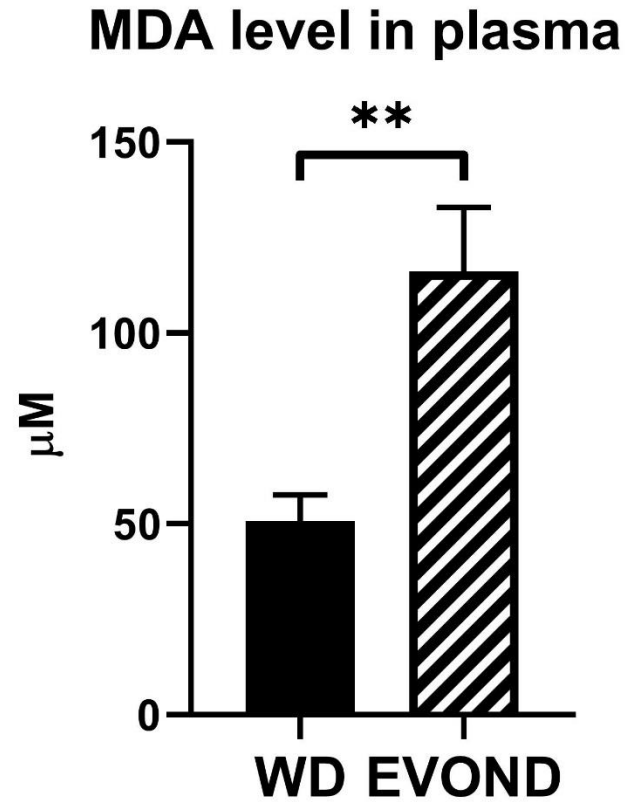

**Supplemental Figure V.** Malondialdehyde (MDA) levels measured by the thiobarbituric acid–reactive substances (TBARS) assay in plasma from mice on WD and EVOND. Data are expressed as mean  $\pm$  SEM. n=7/group, \*\*p<0.01.



# Supplemental Figure VI

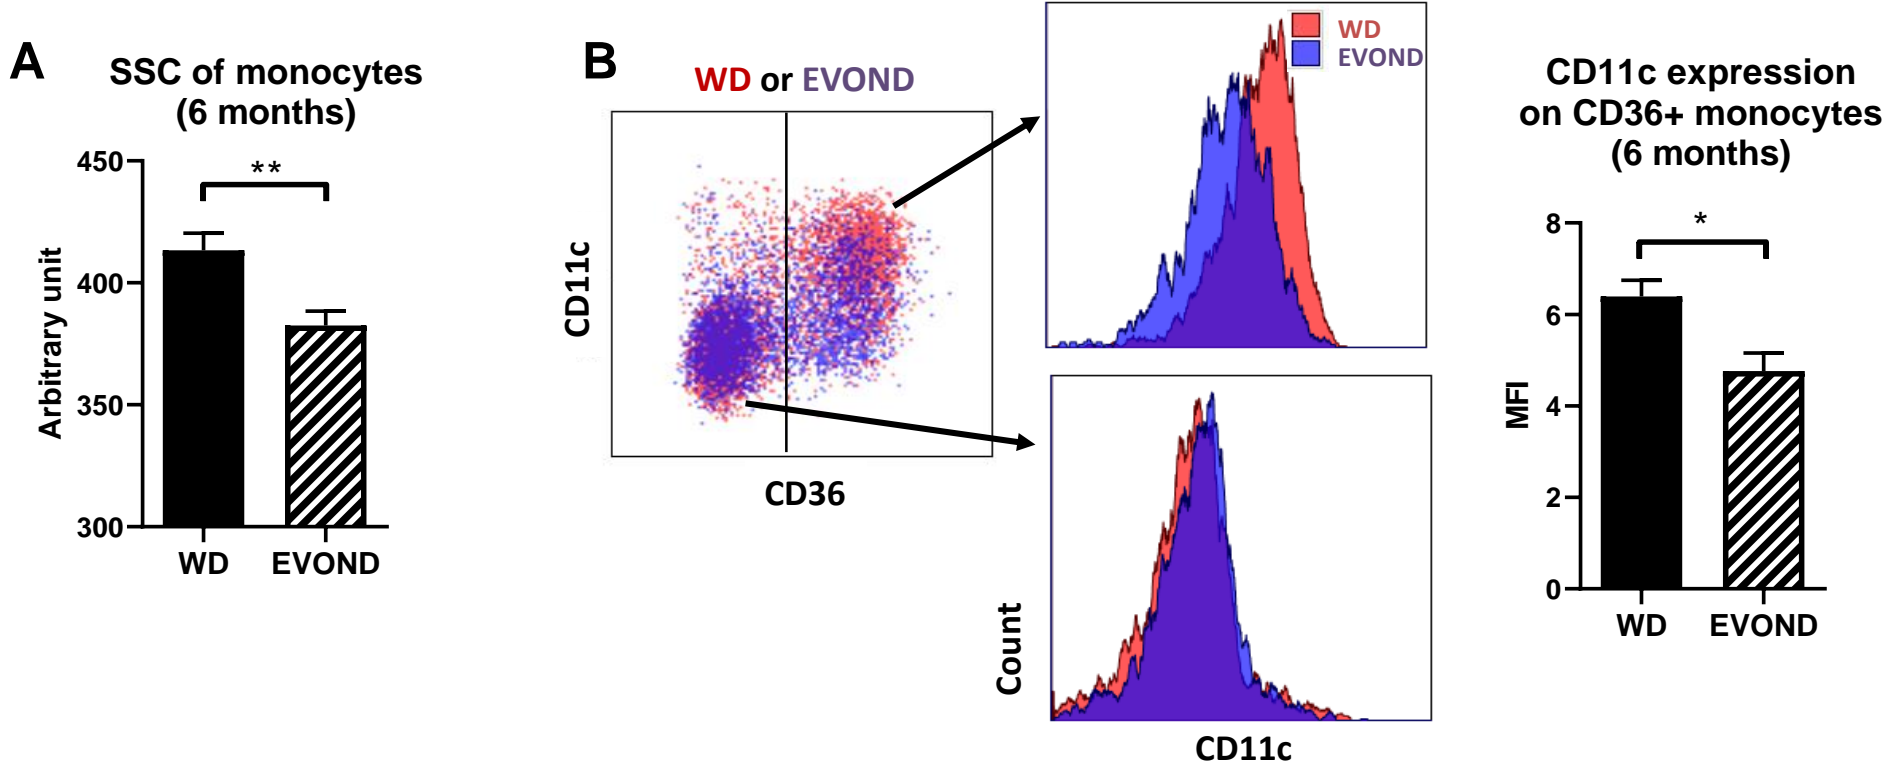

**Supplemental Figure VI.** Mice on EVOND for 6 months had improved monocyte phenotypes. A, SSC value of circulating monocytes of mice on different diets. B, EVOND reduced CD11c expression on CD36<sup>+</sup> monocytes compared to WD. Data are shown as mean  $\pm$  SEM. n=7/group, \*p<0.05, \*\*p<0.01.

## Supplemental Figure VII

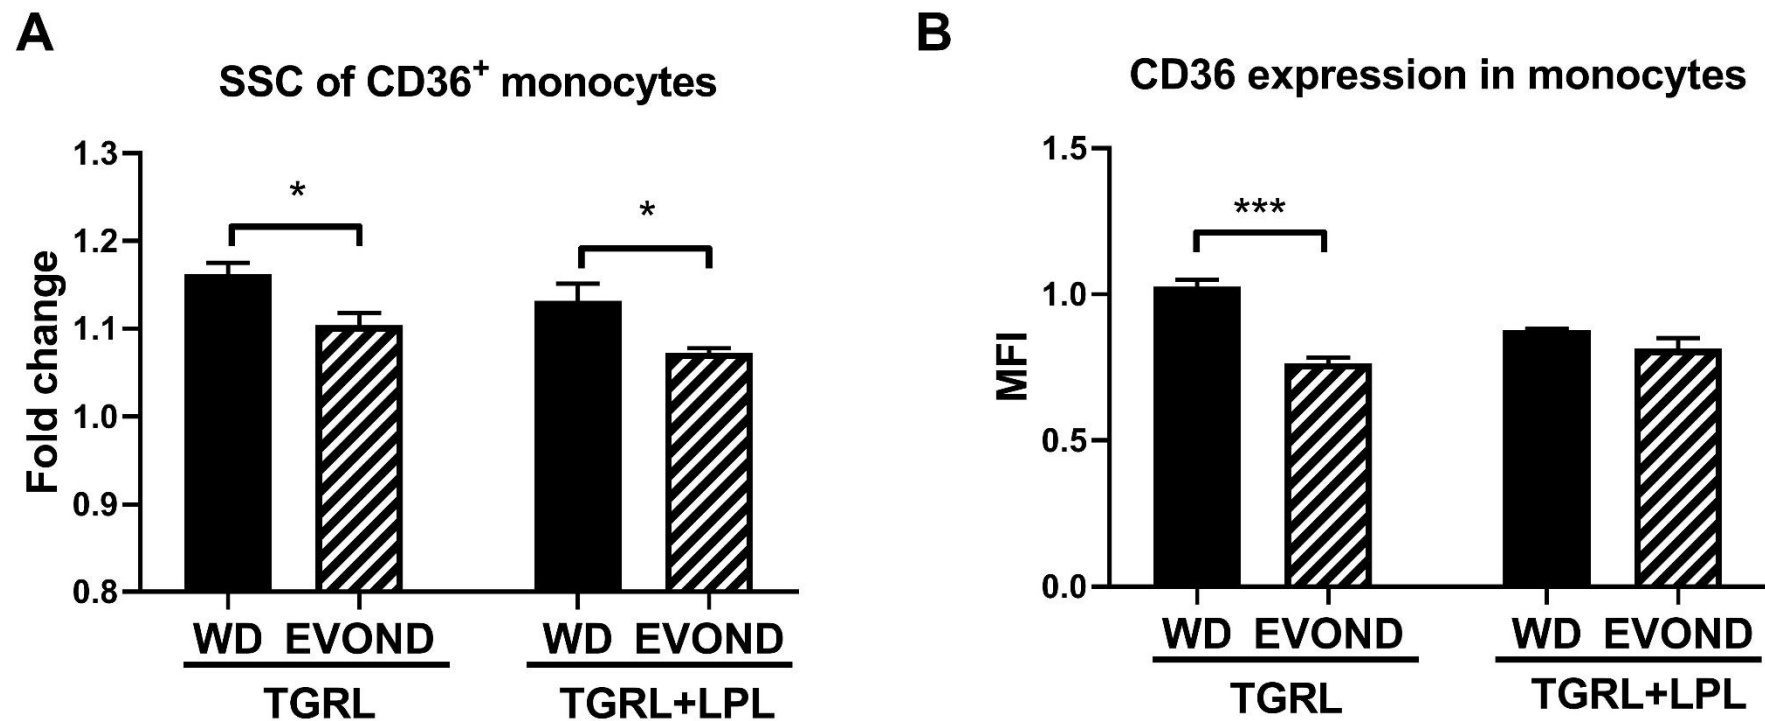

**Supplemental Figure VII.** EVOND reduced monocyte uptake of triglyceride-rich lipoprotein (TGRL) with or without lipoprotein lipase (LPL) pretreatment in vitro. A, SSC value of CD36<sup>+</sup> monocytes (normalized fold change to no TRGL treatment control) and B, MFI level of CD36 on monocytes (from ND-fed *Ldlr*<sup>-/-</sup> mice), after incubation with TGRL alone or TGRL plus LPL from mice on WD or EVOND (n=3/group). Data are shown as mean  $\pm$  SEM. \*p<0.05, \*\*\*p<0.001.

# Supplemental Figure VIII

**Supplemental Figure VIII.** Mice on EVOND vs. WD for 6 months had greater reductions in atherosclerosis than those on diets for 3 months. A, Quantification of oil red O-positive lesion size of the whole aorta from mice on WD or EVOND. B, Representative en face oil red O staining of whole aorta. Data are shown as mean  $\pm$  SEM. n=7/group, \*p<0.05.

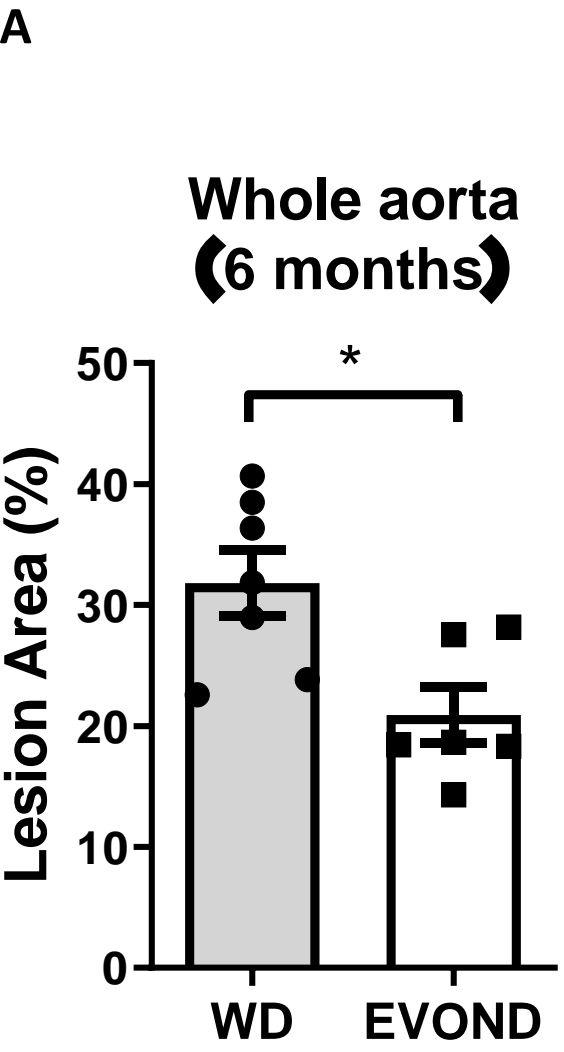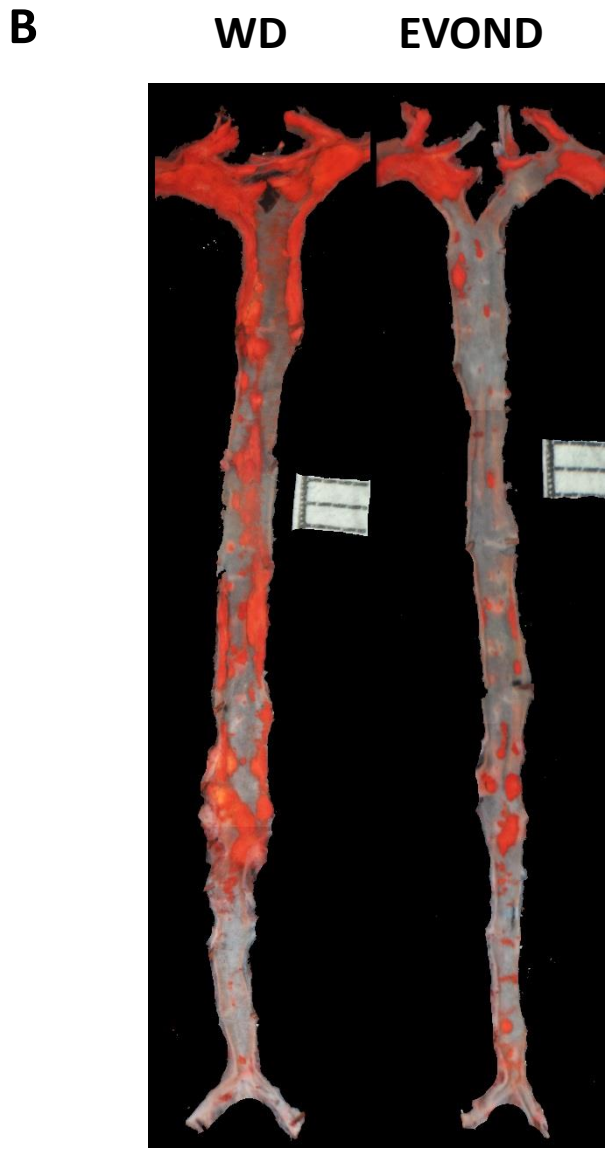

# Supplemental Figure IX

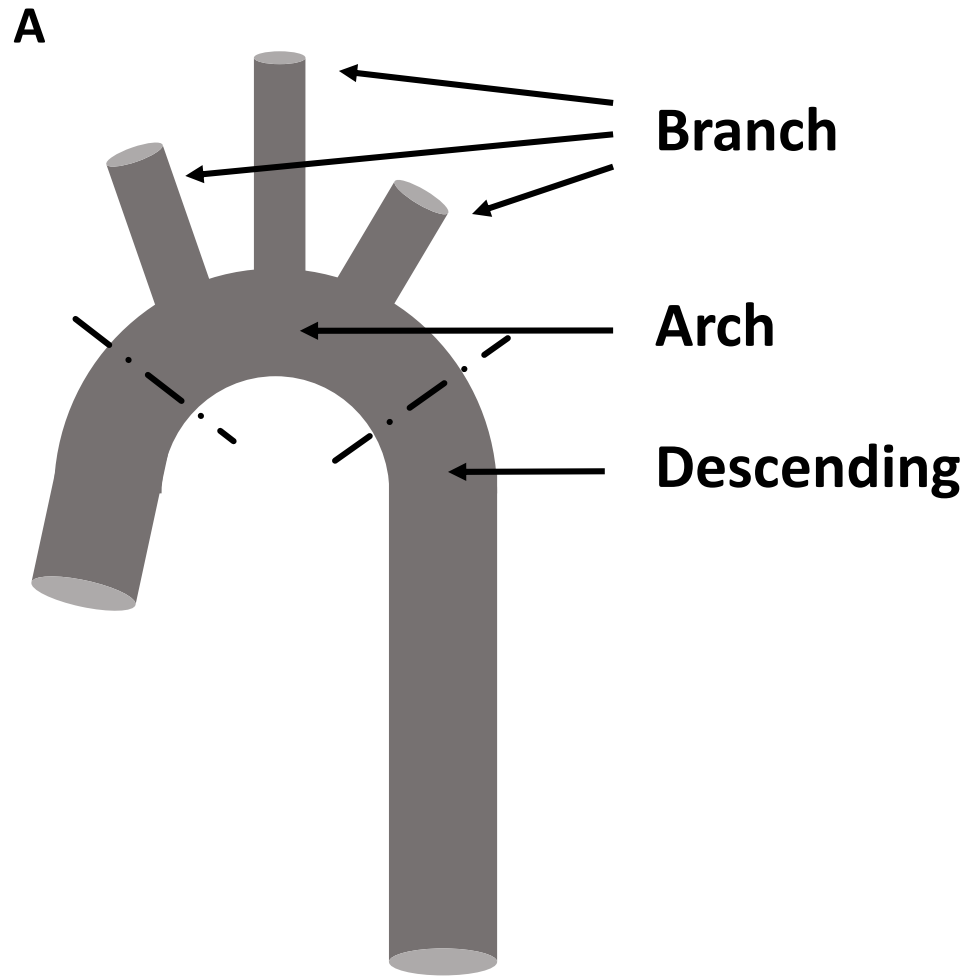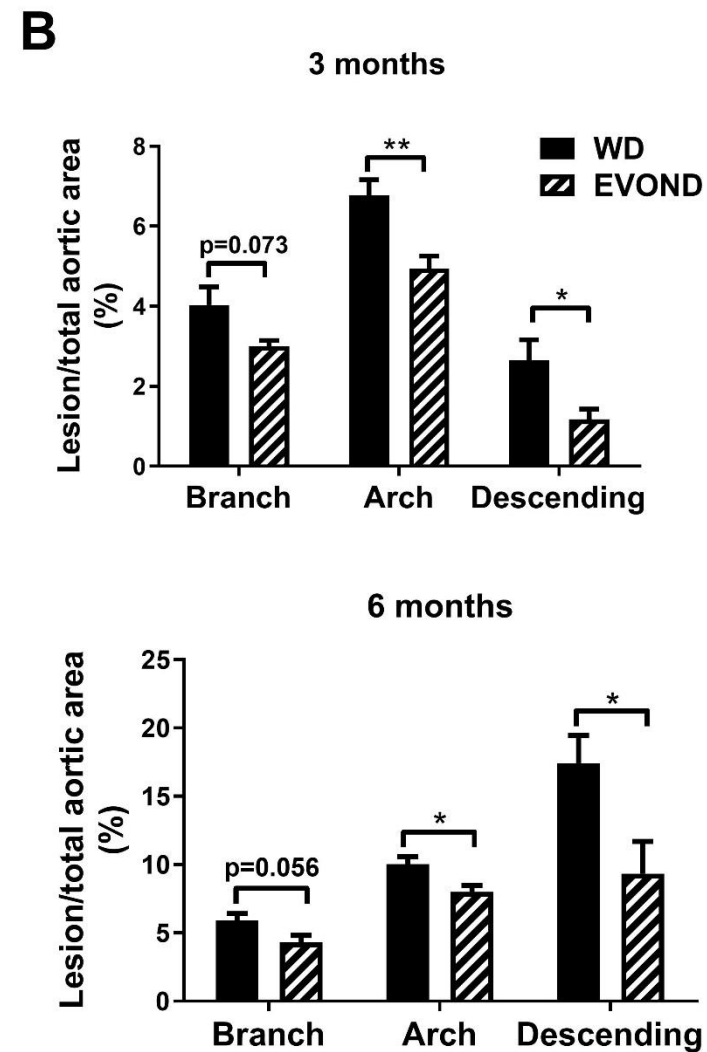

**Supplemental Figure IX.** Quantification of atherosclerotic lesions at aortic branch and arch areas and descending aorta from mice on WD or EVOND. A, Schematic view of aorta areas for lesion size quantification. B, Lesion size as percentage of the whole aorta area from mice on WD or EVOND for 3 months (n=8/group) or 6 months (n=7/group). Data are shown as mean  $\pm$  SEM. \*p<0.05, \*\*p<0.01.

## Major Resources Tables

### Animals (in vivo studies)

| Species                            | Vendor or Source         | Background Strain | Sex  |
|------------------------------------|--------------------------|-------------------|------|
| B6.129S7-Ldlr <sup>tm1Her</sup> /J | The Jackson Laboratories | C57BL/6J          | male |
|                                    |                          |                   |      |
|                                    |                          |                   |      |

### Animal breeding

|                 | Species                            | Vendor or Source         | Background Strain | Other Information |
|-----------------|------------------------------------|--------------------------|-------------------|-------------------|
| Parent - Male   | B6.129S7-Ldlr <sup>tm1Her</sup> /J | The Jackson Laboratories | C57BL/6J          |                   |
| Parent - Female | B6.129S7-Ldlr <sup>tm1Her</sup> /J | The Jackson Laboratories | C57BL/6J          |                   |

### Antibodies

| Target antigen                   | Vendor or Source     | Catalog #  | Working concentration | Lot # (preferred but not required) |
|----------------------------------|----------------------|------------|-----------------------|------------------------------------|
| PE anti-mouse CD115              | eBioscience          | 12-1152-83 | 0.06µg/100µL          |                                    |
| FITC anti-mouse CD204            | Bio-Rad Laboratories | MCA1322F   | 0.1µg/100µL           |                                    |
| FITC anti-mouse CD36             | Bio-Rad Laboratories | MCA2748F   | 1µg/100µL             |                                    |
| PerCP/cy5.5 anti-mouse CD11c     | eBioscience          | 45-0114-82 | 0.25µg/100µL          |                                    |
| PE anti-mouse TNFα               | eBioscience          | 12-7321-41 | 0.125µg/100µL         |                                    |
| PE anti-mouse IL-1β              | eBioscience          | 12-7114-82 | 0.06µg/100µL          |                                    |
| FITC anti-mouse Mac3             | BD Biosciences       | 553323     | 5µg/mL                |                                    |
| PE anti-mouse CD11c              | eBioscience          | 12-0114-82 | 2µg/mL                |                                    |
| Alexa Fluor 488 anti-mouse CD11c | Biolegend            | 117313     | 5µg/mL                |                                    |
| APC anti-mouse Ly-6C             | eBioscience          | 17-5932-82 | 0.125µg/100µL         |                                    |

|                                                        |                |            |               |  |
|--------------------------------------------------------|----------------|------------|---------------|--|
| PerCP-Cyanine5.5 anti-mouse F4/80                      | eBioscience    | 45-4801-82 | 0.5µg/100µL   |  |
| PE Hamster IgG1 κ Isotype Control                      | eBioscience    | 12-4888-81 | 2µg/mL        |  |
| FITC Rat IgG2b, κ Isotype Control                      | BD Biosciences | 556923     | 5µg/mL        |  |
| PE Rat IgG2a kappa Isotype Control                     | eBioscience    | 12-4321-80 | 0.06µg/100µL  |  |
| Alexa Fluor® 488 Armenian Hamster IgG Isotype Ctrl     | Biolegend      | 400923     | 5µg/mL        |  |
| APC Rat IgG2c, κ Isotype Ctrl Antibody                 | Biolegend      | 400713     | 0.125µg/100µL |  |
| PerCP-Cyanine5.5, Armenian Hamster IgG Isotype Control | eBioscience    | 45-4888-80 | 0.25µg/100µL  |  |
| PerCP-Cyanine5.5, Rat IgG2a, κ Isotype Control         | BD Biosciences | 550765     | 5µg/mL        |  |
| FITC Rat IgG2a, κ Isotype Control                      | BD Biosciences | 554688     | 1µg/100µL     |  |
